# Supplementary material for: Natural autophagy blockers, dauricine (DAC) and daurisoline (DAS), sensitize cancer cells to camptothecin-induced toxicity
Source: PubMed Central journal article supplement (PMC5652807; doi:10.18632/oncotarget.20767), 2017-09-08
Supplement: oncotarget-08-77673-s001.pdf [file oncotarget-08-77673-s001.pdf]

## Natural autophagy blockers, dauricine (DAC) and daurisoline (DAS), sensitize cancer cells to camptothecin-induced toxicity

### SUPPLEMENTARY MATERIALS

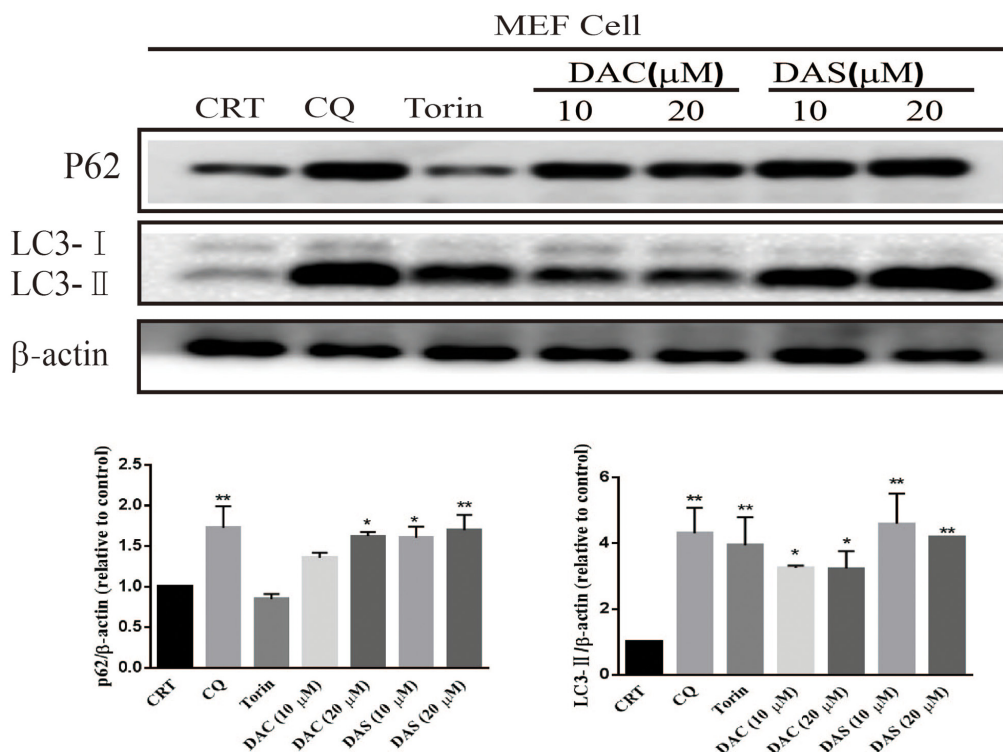

**Supplementary Figure 1: P62 and LC3 expression on MEF cells after treatment of DAC and DAS.** MEF cells were treated with DAC and DAS in different concentrations for 24 h, and the expression of P62 and LC3 were measured by western blotting. Relative intensity of p62 and LC3-II was calculated by Image J (\* $P < 0.05$ , \*\* $P < 0.01$ ). Error bars are mean  $\pm$  SEM. One way ANOVA with Turkey as post hoc tests.

**Supplementary Table 1: IC<sub>50</sub> values of DAC and DAS on the HeLa, A549, and HCT-116 cancer cells**

| Cell type | Compound | IC <sub>50</sub> $\pm$ SEM |
|-----------|----------|----------------------------|
| HeLa      | DAC      | 69.85 $\pm$ 1.03           |
|           | DAS      | 74.75 $\pm$ 1.03           |
| A549      | DAC      | 54.22 $\pm$ 1.02           |
|           | DAS      | 50.54 $\pm$ 1.02           |
| HCT-116   | DAC      | 94.44 $\pm$ 1.04           |
|           | DAS      | 80.81 $\pm$ 1.10           |

All cells are treated with DAC and DAS for 24 h.
